# Supplementary material
Source: PubMed Central journal article supplement (PMC2970635)
Supplement: NIHMS220659-supplement-Supp_Fig_S1-S4___Table_S1-S2.pdf [file NIHMS220659-supplement-Supp_Fig_S1-S4___Table_S1-S2.pdf]

## **DeltaFosB in the nucleus accumbens is critical for reinforcing effects of sexual reward**

Kyle K. Pitchers<sup>1</sup>, Karla S. Frohmader<sup>1</sup>, Vincent Vialou<sup>3</sup>, Ezeikiell Mouzon<sup>3</sup>, Eric J. Nestler<sup>3</sup>  
Michael N. Lehman<sup>1</sup>, and Lique M. Coolen<sup>1,2</sup>

Departments of Anatomy & Cell Biology<sup>1</sup> and Physiology & Pharmacology<sup>2</sup>, Schulich School of Medicine and Dentistry, University of Western Ontario, London, Ontario, Canada, N6A 5C1; Fishberg Department of Neuroscience<sup>3</sup>, Mount Sinai School of Medicine, New York, NY, USA.

| <u>Table of Contents</u> | <u>Page</u> |
|--------------------------|-------------|
| Supplementary Table 1    | 2           |
| Supplementary Table 2    | 2           |
| Supplementary Figure 1   | 3           |
| Supplementary Figure 2   | 3           |
| Supplementary Figure 3   | 4           |
| Supplementary Figure 4   | 4           |

**Supplementary Table 1.** Behavioral paradigm used in experiment 1 to test the effects of sexual experience, and consequential  $\Delta$ FosB induction, on the induction of the immediate-early gene *c-fos* by sexual behavior. Animals were intracardially perfused either 1 hour (NS, ES) or 18-24 hours after final mating session (NNS, ENS).

| Group                    | Day 1 | Day 2 | Day 3 | Day 4 | Day 5          | Final Day |
|--------------------------|-------|-------|-------|-------|----------------|-----------|
| Naïve No Sex             | -     | -     | -     | -     | -              | perfusion |
| Naïve sex (NS)           | -     | -     | -     | -     | sex; perfusion |           |
| Experienced no sex (ENS) | sex   | sex   | sex   | sex   | sex            | perfusion |
| Experienced sex (ES)     | sex   | sex   | sex   | sex   | sex; perfusion |           |

**Supplementary Table 2.** Sexual behavior data for animals in experiment 1 (mean +/- sem). Animals were sacrificed either 1 hour (NS, ES) or 18-24 hours (ENS) after first (NS) or fifth (ENS, ES) mating session (n=6/group). \*indicates significant difference from first mating session. No significant differences were detected between groups for any behavioral measures within the appropriate mating session. Sexual behavior measures: ML, mount latency; IL, intromission latency; EL, ejaculation latency; M, number of mounts; IM, number of intromissions.

| Group              | Sexual Behavior Measure | Mating Session 1 | Mating Session 2 | Mating Session 3 | Mating Session 4 | Mating Session 5 |
|--------------------|-------------------------|------------------|------------------|------------------|------------------|------------------|
| Experienced No Sex | ML                      | 207 +/-11        | 70 +/- 27*       | 108 +/- 41       | 23 +/- 9*        | 19 +/- 8*        |
|                    | IL                      | 207 +/- 11       | 82 +/- 32*       | 118 +/- 43       | 23 +/- 9*        | 19 +/- 8*        |
|                    | EL                      | 1105 +/- 356     | 369 +/- 62*      | 789 +/- 399      | 355 +/- 74*      | 298 +/- 117*     |
|                    | M                       | 9 +/- 5          | 7 +/- 3          | 13 +/- 4         | 3 +/- 2          | 2 +/- 1          |
|                    | IM                      | 16 +/- 3         | 16 +/- 3         | 25 +/- 9         | 19 +/- 1         | 10 +/- 1         |
| Experienced Sex    | ML                      | 389 +/- 119      | 84 +/- 35*       | 162 +/- 126      | 43 +/- 17*       | 73 +/- 33*       |
|                    | IL                      | 392 +/- 117      | 118 +/- 56*      | 165 +/- 129      | 50 +/- 18*       | 101 +/- 46*      |
|                    | EL                      | 1008 +/- 242     | 769 +/- 348*     | 746 +/- 336      | 442 +/- 151*     | 303 +/- 71*      |
|                    | M                       | 8 +/- 3          | 18 +/- 9         | 16 +/- 8         | 9 +/- 3          | 4 +/- 2          |
|                    | IM                      | 13 +/- 1         | 16 +/- 3         | 18 +/- 4         | 18 +/- 7         | 9 +/- 2          |
| Naïve Sex          | ML                      | 329 +/- 182      | -                | -                | -                | -                |
|                    | IL                      | 373 +/- 175      | -                | -                | -                | -                |
|                    | EL                      | 792 +/- 217      | -                | -                | -                | -                |
|                    | M                       | 6 +/- 2          | -                | -                | -                | -                |
|                    | IM                      | 11 +/- 2         | -                | -                | -                | -                |

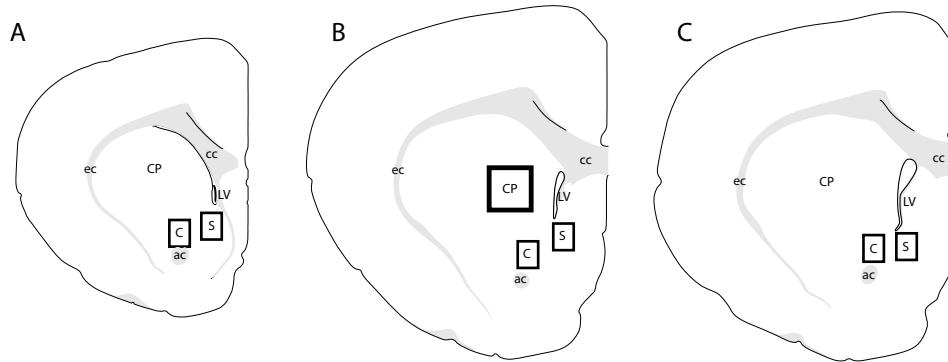

**Supplementary Figure 1.** Schematic drawings illustrating the area of analysis (indicated by the boxes) of  $\Delta$ FosB-IR in the caudate putamen (CP; B), and nucleus accumbens core and shell at rostral (A), middle (B) and caudal (C) levels. Abbreviations: C, NAc core; S, NAc shell; ac, anterior commissure; LV, lateral ventricle; cc, corpus callosum.

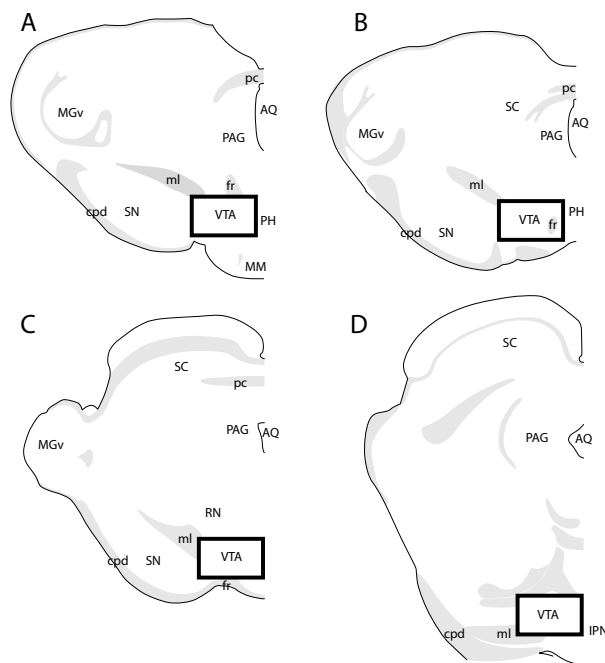

**Supplementary Figure 2.** Schematic drawings illustrating the area of analysis (indicated by the boxes) of  $\Delta$ FosB-IR in the ventral tegmental area at rostral (A), middle (B), caudal (C) and tail levels (D). Abbreviations: ML, medial lemniscus; FR, fasciculus retroflexus; pc, posterior commissure; AQ, cerebral aqueduct; SC, superior colliculus; PAG, periaqueductal grey; PH,

posterior hypothalamus; MGv, medial geniculate ventral part; cpd, cerebral peduncle; RN, red nucleus; IPN, interpeduncular nucleus; MM, medial mammary nucleus.

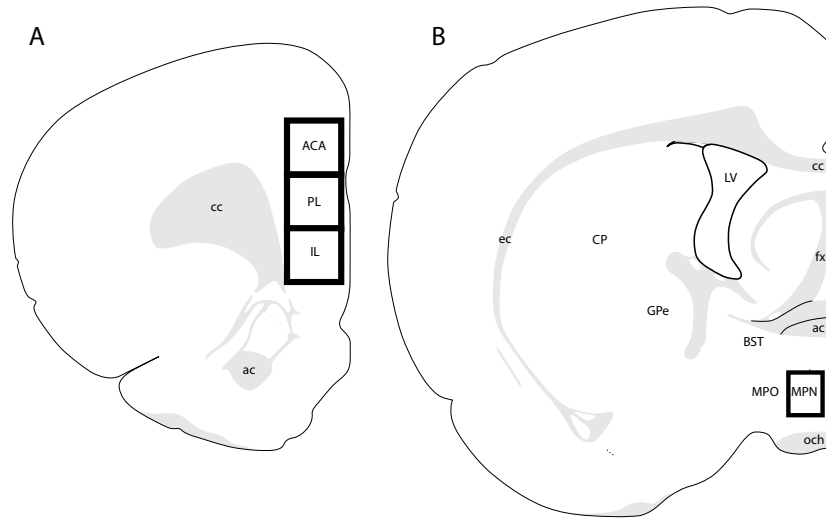

**Supplementary Figure 3.** Schematic drawings illustrating the areas of analysis (indicated by the boxes) of  $\Delta$ FosB-IR in the medial prefrontal cortex (A) and medial preoptic nucleus (B).

Abbreviations: cc, corpus callosum; ac, anterior commissure; ACA, anterior cingulate area; PF, prelimbic area; IL, infralimbic; MPN, medial preoptic nucleus; MPO, medial preoptic area; LV, lateral ventricle; AQ, cerebral aqueduct; CP, caudate putamen; fx, fornix; BST, bed nucleus of the stria terminalis; GPe, globus pallidus external segment; och, optic chiasm; ec, external capsule.

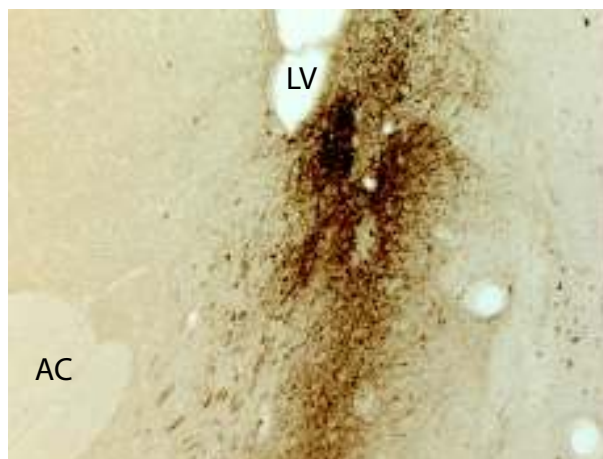

**Supplementary Figure 4.** Representative NAc section showing DAB-GFP staining for injection site verification. Abbreviations: AC, anterior commissure; LV, lateral ventricle.
